# Supplementary material
Source: PubMed Central journal article supplement (PMC4252486)
Supplement: NIHMS627889-supplement-Supplem__Figures_1-3.pdf [file NIHMS627889-supplement-Supplem__Figures_1-3.pdf]

**Selection of fully processed HIV-1 nucleocapsid protein is required for optimal nucleic acid chaperone activity in reverse transcription**

Tiyun Wu, Robert J. Gorelick, and Judith G. Levin

Supplementary Data

Supplementary Figures S1-S3

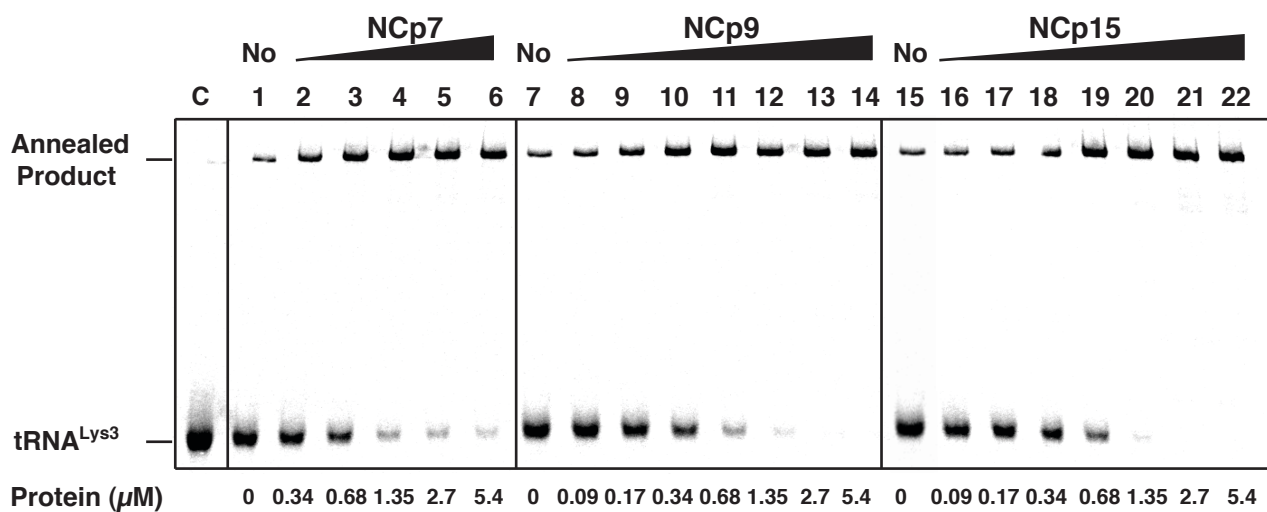

**Figure S1.** Representative gel showing analysis of unannealed and annealed tRNA<sup>Lys3</sup> present after annealing to RNA 200. <sup>33</sup>P-labeled tRNA<sup>Lys3</sup> was annealed to RNA 200 in the absence (lanes 1, 7, and 15) or presence of increasing concentrations of NCp7 (lanes 2 to 6), NCp9 (Lanes 8 to 14), and NCp15 (lanes 16 to 22). The lane labeled C represents a control reaction that contained only annealing buffer and <sup>33</sup>P-labeled tRNA<sup>Lys3</sup>.

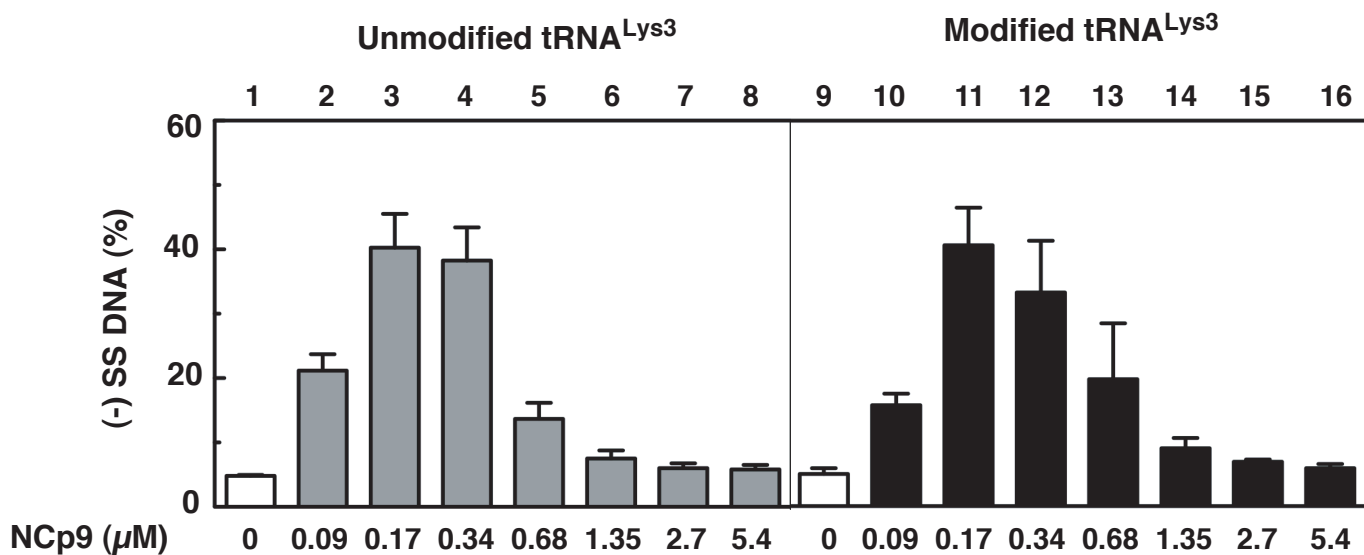

**Figure S2.** Effect of NCp9 on (-) SSDNA synthesis in reactions with unmodified or modified tRNA<sup>Lys3</sup> primer. Bar graphs show the % (-) SSDNA product synthesized as a function of NCp9 concentration. Symbols: no protein, open bars (lanes 1 and 9); Unmodified tRNA<sup>Lys3</sup>, gray bars (lanes 2 to 8); Modified tRNA<sup>Lys3</sup>, closed bars (lanes 10 to 16).

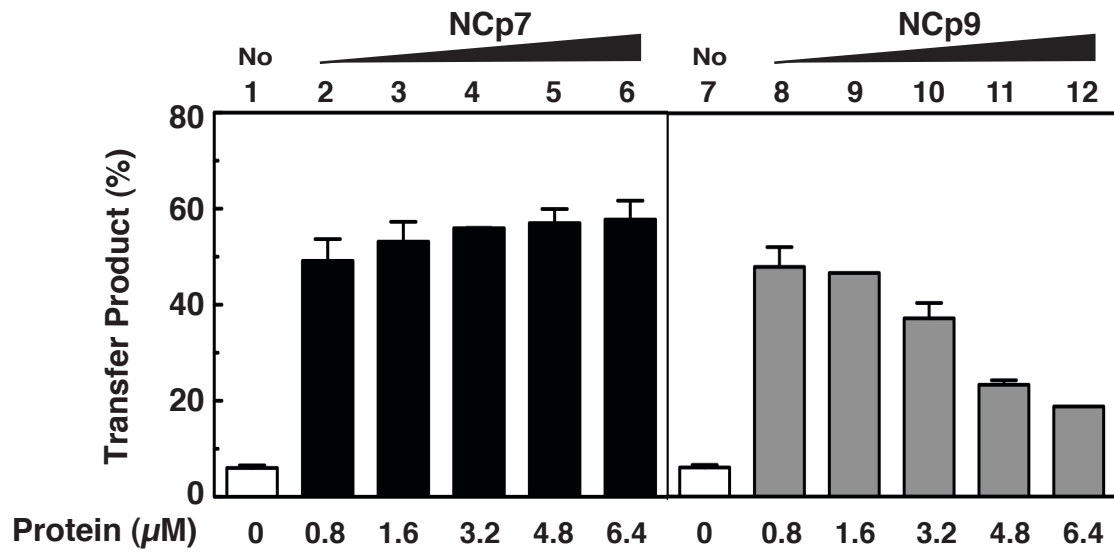

**Figure S3.** Effect of high concentrations of NCp7 and NCp9 on minus-strand transfer. Bar graphs show the % transfer product synthesized as a function of protein concentration. Symbols: no protein, open bars (lanes 1 and 8); NCp7, closed bars (lanes 2 to 6); NCp9, dark gray bars (lanes 9 to 12).
